# Supplementary material for: Primary amine recognition in water by a calix[6]aza-cryptand incorporated in dodecylphosphocholine micelles
Source: Royal Society of Chemistry journal article supplement (doi:10.1039/c4ob02495h), 2015-01-01
Supplement: c4ob02495h1.pdf [file c4ob02495h1.pdf]

## Supporting information

### Primary Amine Recognition in Water by a Calix[6]aza-cryptand Incorporated in Dodecylphosphocholine Micelles

*Emilio Brunetti, Alex Inthasot, Flore Keymeulen, Olivia Reinaud, Ivan Jabin\* and Kristin  
Bartik\**

|                                                                                                                                                                     |   |
|---------------------------------------------------------------------------------------------------------------------------------------------------------------------|---|
| SI1. 2D DOSY experiment (298K, 600MHz, D <sub>2</sub> O) with <b>1.Zn<sup>2+</sup></b> in DPC                                                                       | 2 |
| SI2. NMR PRE experiment (298K, 600MHz, D <sub>2</sub> O) with <b>1.Zn<sup>2+</sup></b> in DPC                                                                       | 3 |
| SI3. <sup>1</sup> H NMR (298K, 300MHz, D <sub>2</sub> O) spectrum of <b>1.nH<sup>+</sup></b> in DPC                                                                 | 4 |
| SI4. Determination of the <i>pseudo</i> pK <sub>a</sub> for PrNH <sub>2</sub> with <b>1.Zn<sup>2+</sup></b> in DPC                                                  | 5 |
| SI5. <sup>1</sup> H NMR (298K, 600MHz, D <sub>2</sub> O) spectra of <b>1.Zn<sup>2+</sup></b> , in the absence and presence of EtNH <sub>2</sub> in DPC- <i>d</i> 38 | 6 |
| SI6. <sup>1</sup> H NMR (298K, 600MHz, D <sub>2</sub> O) spectra of <b>1.Zn<sup>2+</sup></b> , in the absence and presence of HeptylNH <sub>2</sub> in DPC          | 7 |
| SI7. Experimental conditions for titrations of <b>1.Zn<sup>2+</sup></b> with amines, alcohols and aminoalcohols in DPC (298 K, D <sub>2</sub> O)                    | 8 |

SI1. 2D DOSY experiment (298K, 600MHz, D<sub>2</sub>O) with **1.Zn<sup>2+</sup>** in DPC

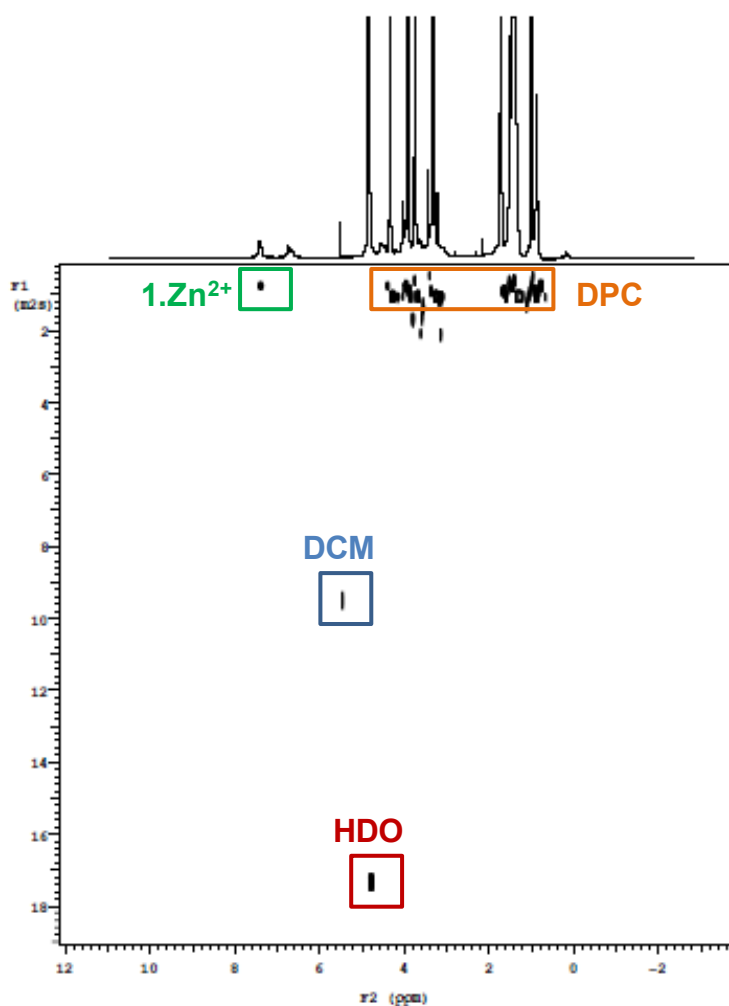

The x- and y- axis represent the regular <sup>1</sup>H chemical shift and the diffusion coefficient, respectively. DCM: residual dichloromethane; HDO: solvent signal chosen as reference for diffusion coefficient determination ( $D = 19.02 \times 10^{-10} \text{ m}^2/\text{s}$  at 298 K).

SI2. PRE NMR experiments (298K, 600MHz, D<sub>2</sub>O) with **1.Zn<sup>2+</sup>** in DPC

Normalized relaxivity (measured relaxivity divided by relaxivity of  $\alpha$ CH<sub>2</sub> protons of the surfactant;  $\phi$ ; mM<sup>-1</sup>s<sup>-1</sup>; error < 15%): values for the nuclei of DPC (20 mM) and for the nuclei of the incorporated complex **1.Zn<sup>2+</sup>** (0.5 mM).

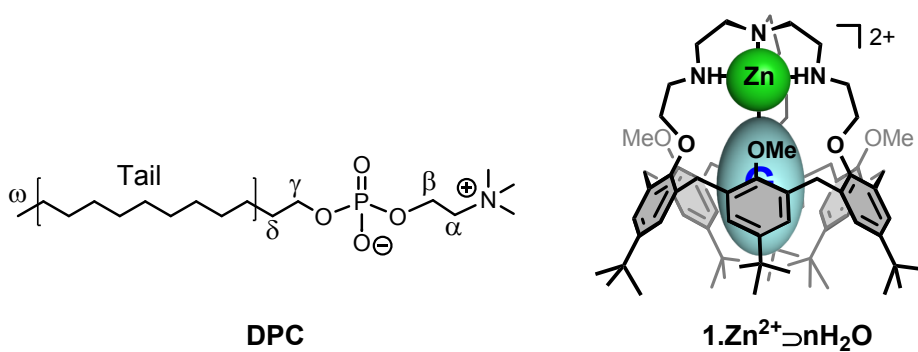

| <sup>+</sup> N(CH <sub>3</sub> ) <sub>3</sub> | $\alpha$ | $\beta$ | $\gamma$ | $\delta$ | Tail | $\omega$ | ArH <sup>cap</sup> | ArH <sup>2OMe</sup> | tBu <sup>OMe</sup> |
|-----------------------------------------------|----------|---------|----------|----------|------|----------|--------------------|---------------------|--------------------|
| 0.89                                          | 1        | 0.51    | 0.29     | 0.18     | 0.08 | 0.06     | 0.18               | 0.14                | 0.05               |

SI3.  $^1\text{H}$  NMR (298K, 300MHz,  $\text{D}_2\text{O}$ ) spectrum of  $\mathbf{1.nH}^+$  in DPC

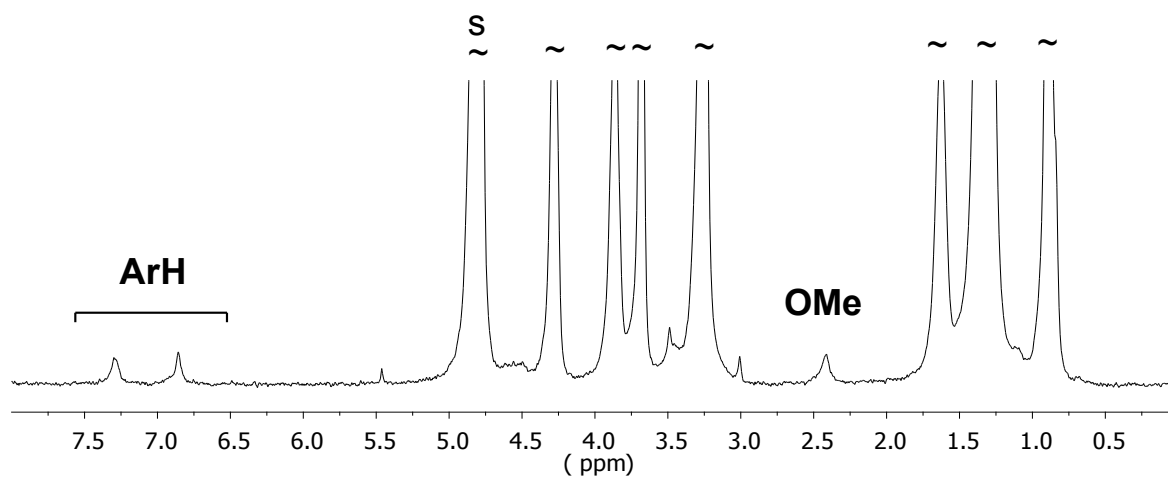

$^1\text{H}$  NMR spectrum (300 MHz, 298 K) of  $\mathbf{1.nH}^+$  in DPC (20 mM in  $\text{D}_2\text{O}$  at pH  $\sim$ 3.1); s: solvent.

#### SI4. Determination of the *pseudo* pKa shift for PrNH<sub>2</sub>

The formation constant  $K$  and  $K'_{\text{pH}}$  are defined according to the following equilibrium:

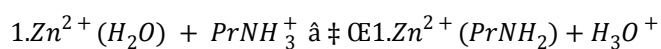

$$K = \frac{[1.Zn^{2+}(PrNH_2)][H_3O^+]}{[1.Zn^{2+}(H_2O)][PrNH_3^+]}$$

$$K'_{\text{pH}} = \frac{[1.Zn^{2+}(PrNH_2)]}{[1.Zn^{2+}(H_2O)][PrNH_3^+]}$$

From analysis and signal integration in the <sup>1</sup>H NMR spectra (see experimental section of article for details).  $K$  was found to be  $\sim 5 \times 10^{-5}$  at pH  $\sim 8$  and  $K'_{\text{pH}} \sim 5000 \text{ M}^{-1}$ . From these data, we can estimate a *pseudo* pK<sub>a</sub> ( $-\log K$ ) of  $\sim 4.3$ .

SI5.  $^1\text{H}$  NMR (298K, 600MHz,  $\text{D}_2\text{O}$ ) spectra of  $1.\text{Zn}^{2+}$  in the absence and presence of  $\text{EtNH}_2$  in  $\text{DPC-}d38$

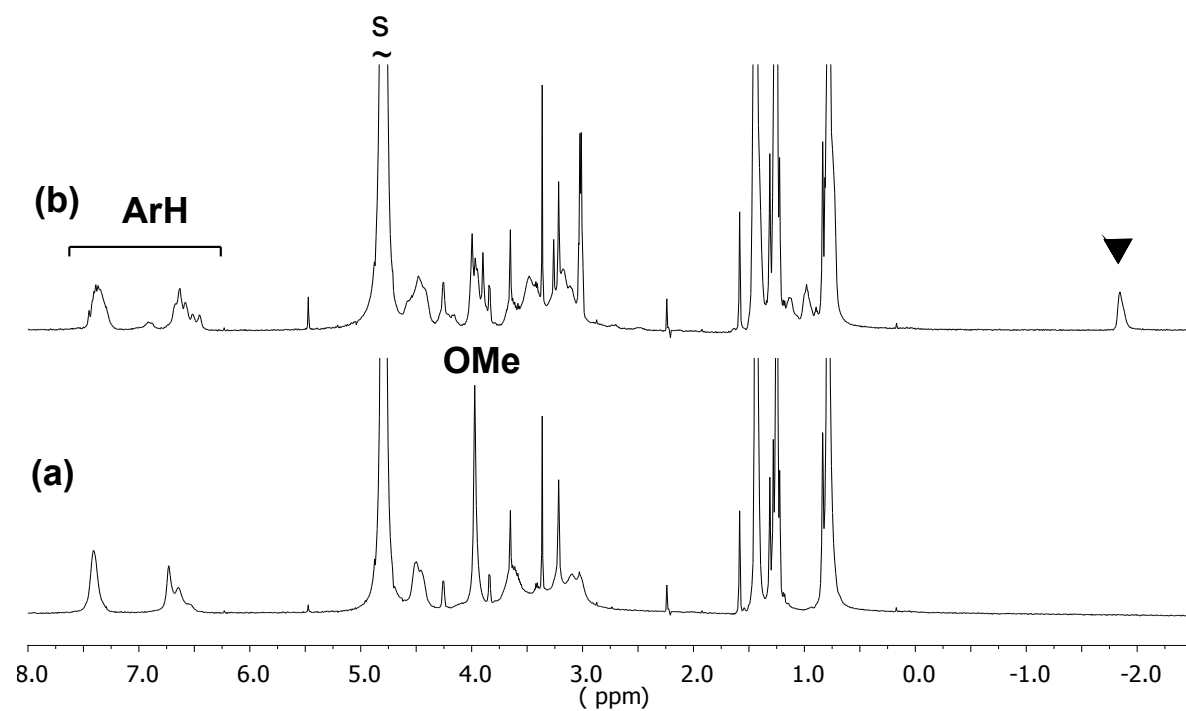

$^1\text{H}$  NMR spectra (600 MHz, 298 K) of (a)  $1.\text{Zn}^{2+}$  in  $\text{DPC-}d38$  (20 mM in  $\text{D}_2\text{O}$  at pH  $\sim 7.6$ ); (b)  $1.\text{Zn}^{2+}$  in  $\text{DPC-}d38$  (20 mM in  $\text{D}_2\text{O}$ ) after the addition of  $\sim 3$  equiv. of  $\text{EtNH}_2$ .  $\blacktriangledown$ :  $\text{EtNH}_2$  in; s: solvent.

SI6.  $^1\text{H}$  NMR (298K, 600MHz,  $\text{D}_2\text{O}$ ) spectra of  $1.\text{Zn}^{2+}$  in the absence and presence of Heptyl $\text{NH}_2$  in DPC micelles.

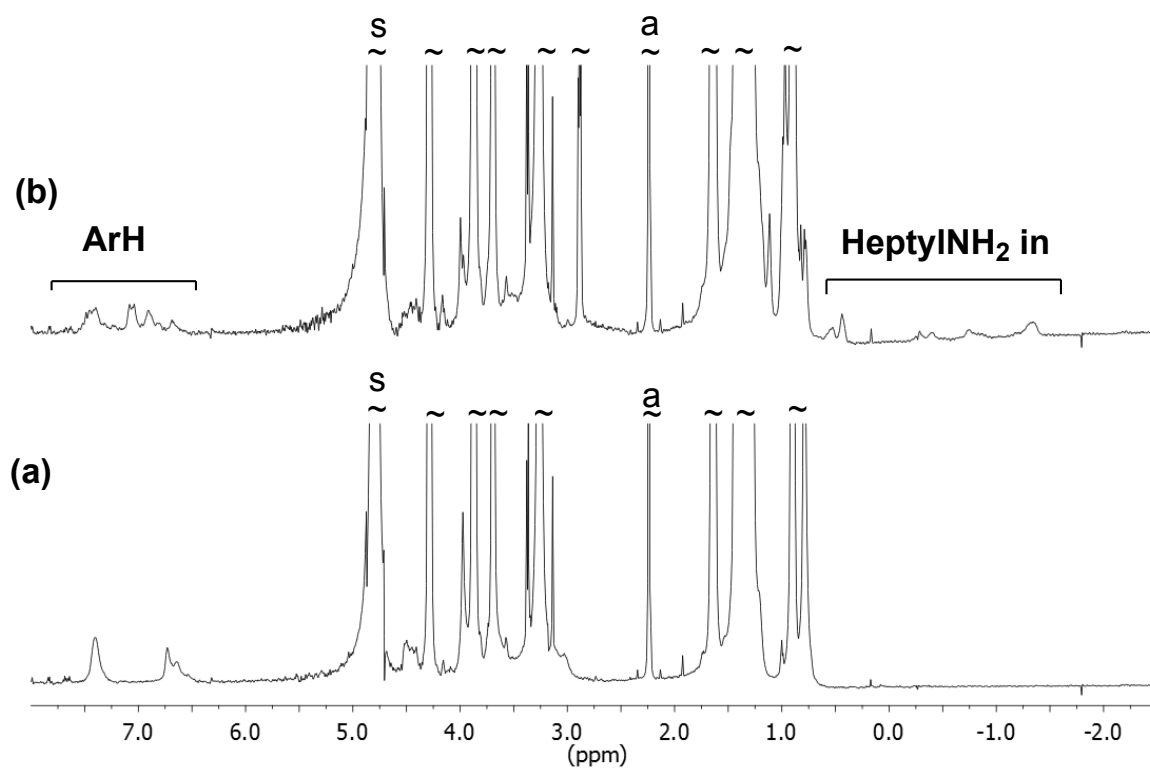

$^1\text{H}$  NMR spectra (600 MHz, 298 K) of (a)  $1.\text{Zn}^{2+}$  in DPC (20 mM in  $\text{D}_2\text{O}$  at pH  $\sim 7.6$ ); (b)  $1.\text{Zn}^{2+}$  in DPC (20 mM in  $\text{D}_2\text{O}$ ) after the addition of  $\sim 7$  equiv. of Heptyl $\text{NH}_2$ . s: solvent; a: acetone.

SI7. Experimental conditions for titrations of **1.Zn<sup>2+</sup>** with amines, alcohols and aminoalcohols in DPC

The potential binding of different **guests** was monitored via <sup>1</sup>H NMR titration experiments at room temperature with ~0.5 mM solutions of **1.Zn<sup>2+</sup>** in DPC (20 mM in D<sub>2</sub>O). Progressive additions of the investigated potential guest, until the final concentration indicated below, were undertaken (pH monitored are also indicated). No signals for included guest were observed in the <sup>1</sup>H NMR spectra for the following molecules:

- (i) *t*BuNH<sub>2</sub> up to 6 mM (pH ~7.8, ~10.4 and 11);
- (ii) (Et)<sub>2</sub>NH up to 15 mM (pH ~7.8 and 11). This amine added after the experiment undertaken in (i);
- (iii) ethanol up to 365 mM (pH ~7.6);
- (iv) propanol up to 340 mM (pH ~7.6);
- (v) butanol up to 18 mM (pH ~7.6). This alcohol added after the experiment undertaken in (iv);
- (vi) octanol up to 50 mM (pH ~7.6);
- (vii) ethanolamine up to 25 mM (pH ~7.6);
- (viii) (±)-1-amino-2-propanol up to 3.5 mM (pH ~6.0 and pH ~10.4);
- (xi) (±)-2-amino-1-propanol up to 3.7 mM (pH ~5.5 and pH ~10.5);
- (x) 6-amino-1-hexanol up to 10 mM (no pH value available);
